# Supplementary material
Source: publisher site journal article supplement (https://www.dovepress.com/article/385278)
Supplement: Supplementary file 1 [file get_supplementary_file.php]

1 **Supplementary Data**

2

3 **Supplementary Figure S1**

4

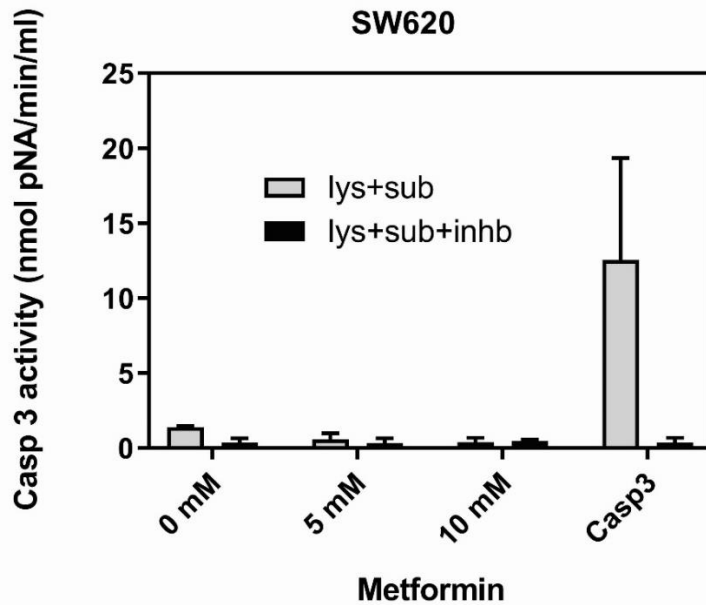

5

6

7 **Figure S1:** Metformin did not induce caspase 3 activity in SW620 cells. For the caspase 3 activity  
8 assay, lysates were prepared from  $10^7$  untreated cells (0 mM metformin), and cells treated with 5  
9 mM and 10 mM metformin for 48 hrs. Recombinant caspase 3 (a component of the kit) served as  
10 a positive control for the caspase 3 reaction (Casp3). Ten  $\mu$ l of lysates were applied in one reaction,  
11 and each was added with caspase 3 substrate (Ac-DEVD-pNA) and caspase 3 substrate + caspase  
12 3 inhibitor (Ac-DEVD-CHO). Caspase 3 activity is presented in nmol pNA/min/ml (Caspase 3 Assay  
13 Kit, Sigma #CASP-3-C). Data show mean values  $\pm$ SD from three independent experiments.

14 **Abbreviations:** lys, lysate; sub, substrate; inhb, inhibitor.

15

16

17 **Supplementary Figure S2**

18

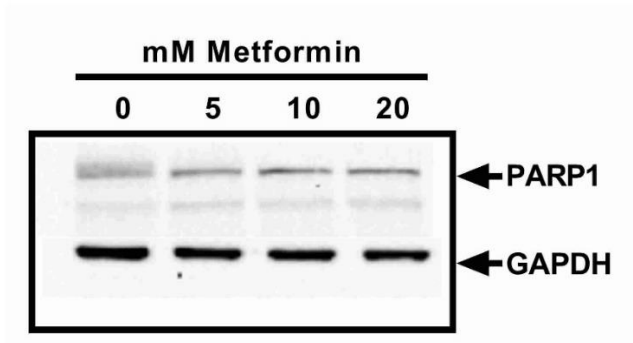

19

20

21 **Figure S2:** Metformin did not induce PARP1 cleavage in SW620. Cells were treated with 0, 5, 10,  
22 and 20 mM metformin for 48 hours. Protein lysates were prepared as mentioned in Materials and  
23 Methods. Thirty  $\mu$ g proteins were loaded on 10% SDS PAGE and separated proteins were  
24 transferred onto nitrocellulose membranes. Antibody detections were performed using anti PARP1  
25 antibody (#9542, CST) in (1:1000) dilution in blocking buffer. Loading controls for this SW620 blot  
26 was GAPDH (anti-GAPDH antibody, #G9545, Sigma). The data shown are representative of three  
27 independent experiments.

28

29
